# Supplementary material for: TFIIS is required for the balanced expression of the genes encoding ribosomal components under transcriptional stress
Source: PubMed Central journal article supplement — Nucleic Acids Res. 2012 Apr 27;40(14):6508–19. doi: 10.1093/nar/gks340 (PMC3413141; doi:10.1093/nar/gks340), 2012-04-27
Supplement: supp_gks340_Supplementary_information.pdf [file supp_gks340_Supplementary_information.pdf]

## Supplementary information

### Legends

**Supplementary Figure S1.** Insertion mutagenesis and suppressors screening.

**Supplementary Figure S2.** *DAS* suppressors. **A.** The *das* mutants suppress *dst1Δ* sensitivity to 6AU and MPA. Serial dilutions of the indicated isogenic mutants after three days of growth on SC-URA plates in the presence of 6AU or MPA at the indicated concentration. All the strains were BY4741 derivatives. **B.** Effect of 6AU (25 μg/ml) on the doubling times (d.t.) of the liquid cultures of the wild type and the indicated mutants, as described in the Materials and Methods. Note that unlike the microcolony assay, the proliferation of the wild type in the liquid culture was affected by 6AU.

**Supplementary Figure S3.** Deletion of *SFPI* suppresses the sensitivity of *dst1Δ* to 6AU in a microcolony assay. **A.** Alginate microcapsules containing the representative microcolonies of the experiments described in Figure 1A. **B.** Comparison of the size distributions of the microcolonies developed by the isogenic *dst1Δ* and *dst1Δsfp1Δ* cells incubated in the presence of 25 μg/ml 6AU for 20 h. See Figure 1 for additional details.

### **Supplementary Figure S4.**

Quantification of the Northern blots showing the effect of 6AU (100 μg/ml, 90 min) on the mRNA levels of *IMD2* in the wild type and the indicated isogenic mutants. A fold induction (+6AU/-6AU) is indicated for each strain.

**Supplementary Figure S5.** *sch9Δ* suppresses *imd2Δ* sensitivity to MPA. Serial dilutions of the indicated isogenic mutants after 3 days of growth on SC-URA plates in the presence of MPA (2 μg/ml). All the strains were BY4741 derivatives.

**Supplementary Figure S6.** Mutations affecting the regulators of RP genes suppress *dst1Δ* sensitivity to MPA. **A.** Serial dilutions of the indicated *RAP1* partial deletion mutants (**A**) or the *tpk2Δ* mutant (**B**) after 3 days of growth on SC-URA plates in the

presence of MPA (10  $\mu\text{g/ml}$ ). The deleted region of each *RAP1* mutant is shown in the diagram below.

**Supplementary Figure S7.** TFIIIS binding to RNA pol I- (A) and RNA pol II-dependent genes (B) can be detected by ChIP. The ChIP experiments were performed utilising anti-HA antibodies and were quantified in relation to the input material. No-tag controls confirm the specificity of the HA-TFIIIS signals. The six amplicons for rDNA were located as shown in Figure 2. The results of an untranscribed intergenic region (Chromosome V, coordinates 9716-9863) are also provided. Error bars indicate standard deviation.

**Supplementary Figure S8.** TFIIIS and RNA polymerase II occupancy in response to 6AU. Changes in HA-TFIIIS (A) and Rpb3 (B) binding to *RRPA43* and *RRP12* in response to 6AU (100  $\mu\text{g/ml}$ ). All the values represent the average of three independent experiments at three different amplicons distributed along the genes. Samples were taken from the same extracts to analyse HA-TFIIIS and Rpb3 in parallel. ChIP signals were quantified in relation to the input material. The results of an untranscribed intergenic region (Chromosome V, coordinates 9716-9863) are also shown. Error bars indicate standard deviation. C. Changes in the TFIIIS/RNA polymerase II ratios upon 6AU (100  $\mu\text{g/ml}$ ) addition, as measured by ChIP experiments utilising antibodies against HA-TFIIIS and Rpb3. All the values represent the average of three independent experiments at three different amplicons (shown in Figure 3A and B).

**Supplementary Figure S9.** Changes in RNA polymerase II occupancy upon 6AU addition (100  $\mu\text{g/ml}$ ) to the wild type and the indicated isogenic strains. All the values represent the average of three independent experiments at three different amplicons distributed along the genes. ChIP signals were quantified in relation to the input material. The results of an untranscribed intergenic region (Chromosome V, coordinates 9716-9863) are also shown. Error bars indicate standard deviation.

**Supplementary Figure S10.** Variation in the levels of the active RNA polymerases sitting on the indicated genes, as measured by transcriptional run-on, caused by

6AU addition (100 µg/ml) to the wild type and to an isogenic *dst1Δ* strain in both the presence (A) and absence of Sfp1 (B). All the values represent the average of three independent experiments normalised to the signal given by the same gene at time 0. Error bars indicate standard deviation.

Figure S1

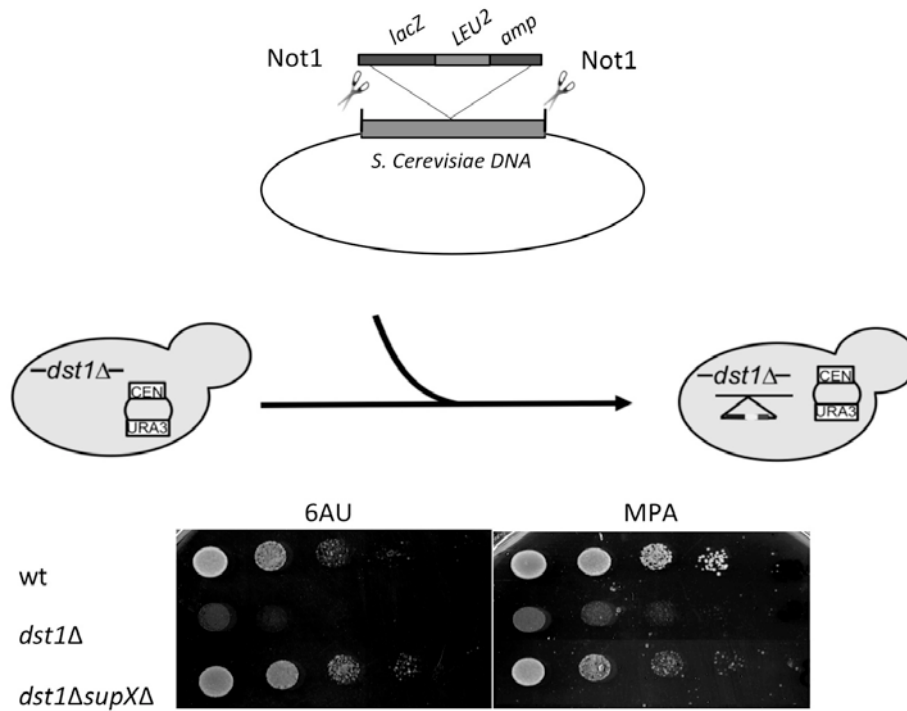

| Round | [6AU] $\mu\text{g/ml}$ | Number of transformants | 6AU <sup>r</sup> | MPA <sup>r</sup> | Unic insertion | Insertion ligated phenotype |
|-------|------------------------|-------------------------|------------------|------------------|----------------|-----------------------------|
| 1     | 25                     | 7600                    | 2                | 2                | 2              | 2                           |
| 2     | 10                     | 7641                    | 7                | 3                | 2              | 3                           |
| 3     | 20                     | 4382                    | 5                | 3                | 3              | 1                           |

| Candidate | Disrupted ORF  | BY4741 suppression | Plasmid complementation | Suppressor  |
|-----------|----------------|--------------------|-------------------------|-------------|
| 1.1       | <i>YDR020c</i> | Yes                | -                       | <i>DAS2</i> |
| 1.2       | <i>SFP1</i>    | Yes                | -                       | <i>DAS4</i> |
| 2.9       | <i>SCH9</i>    | Yes                | -                       | <i>DAS5</i> |
| 2.20      | <i>RPL40A</i>  | No                 | Yes                     | <i>DAS3</i> |
| 3.8       | <i>YJL149w</i> | Yes                | -                       | <i>DAS1</i> |

Figure S2

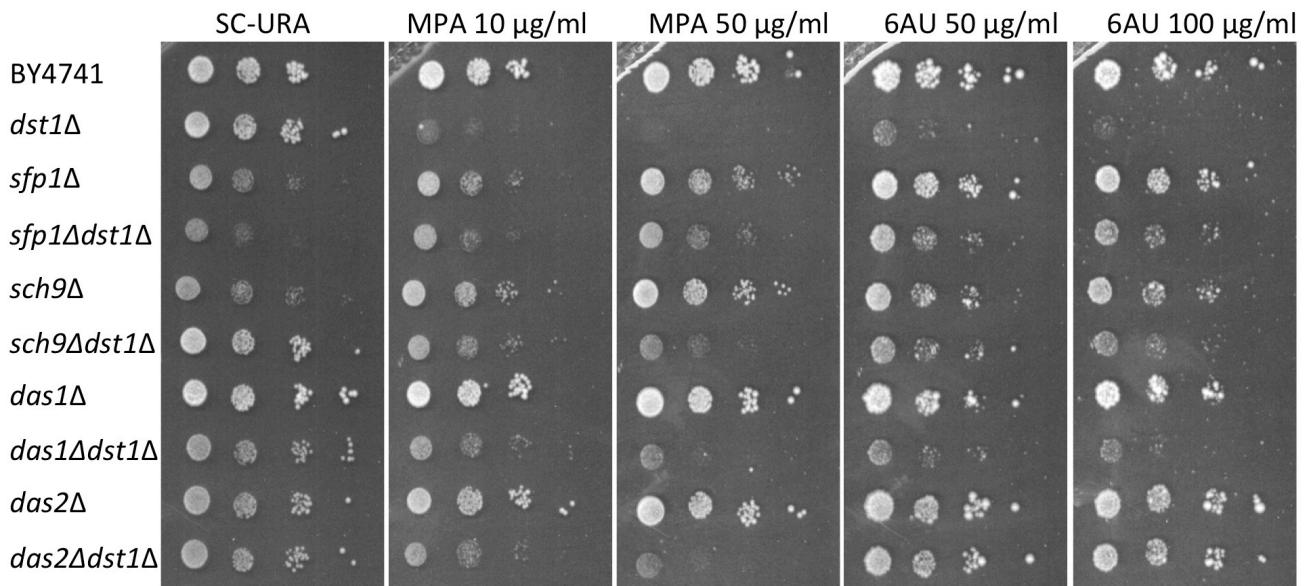

Time (min)

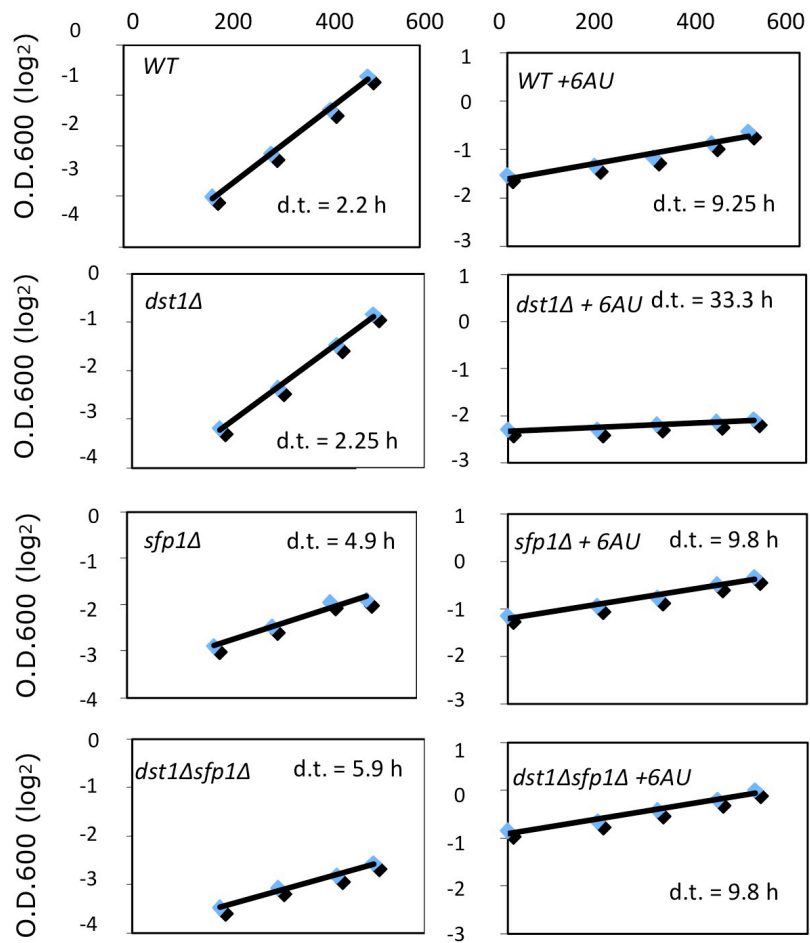

Figure S3

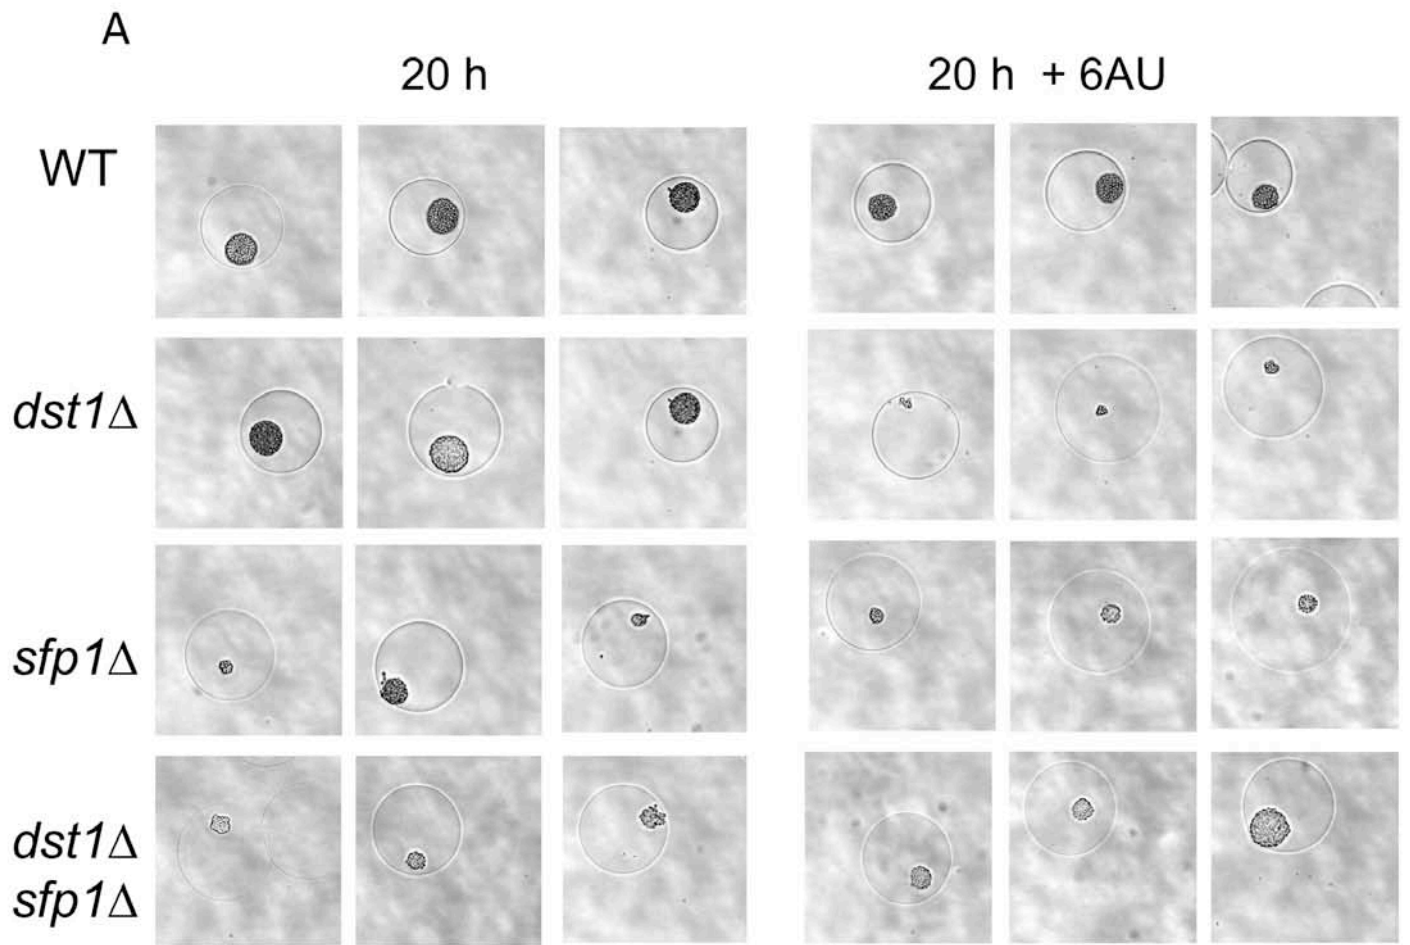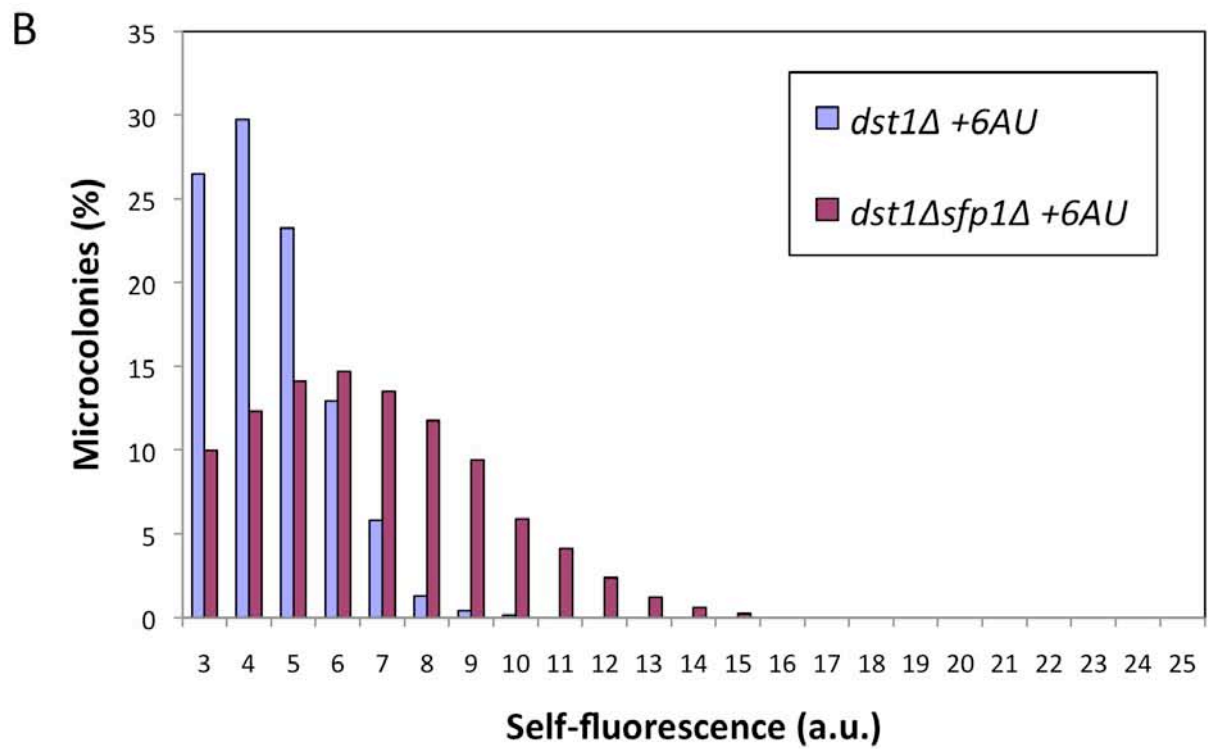

Figure S4

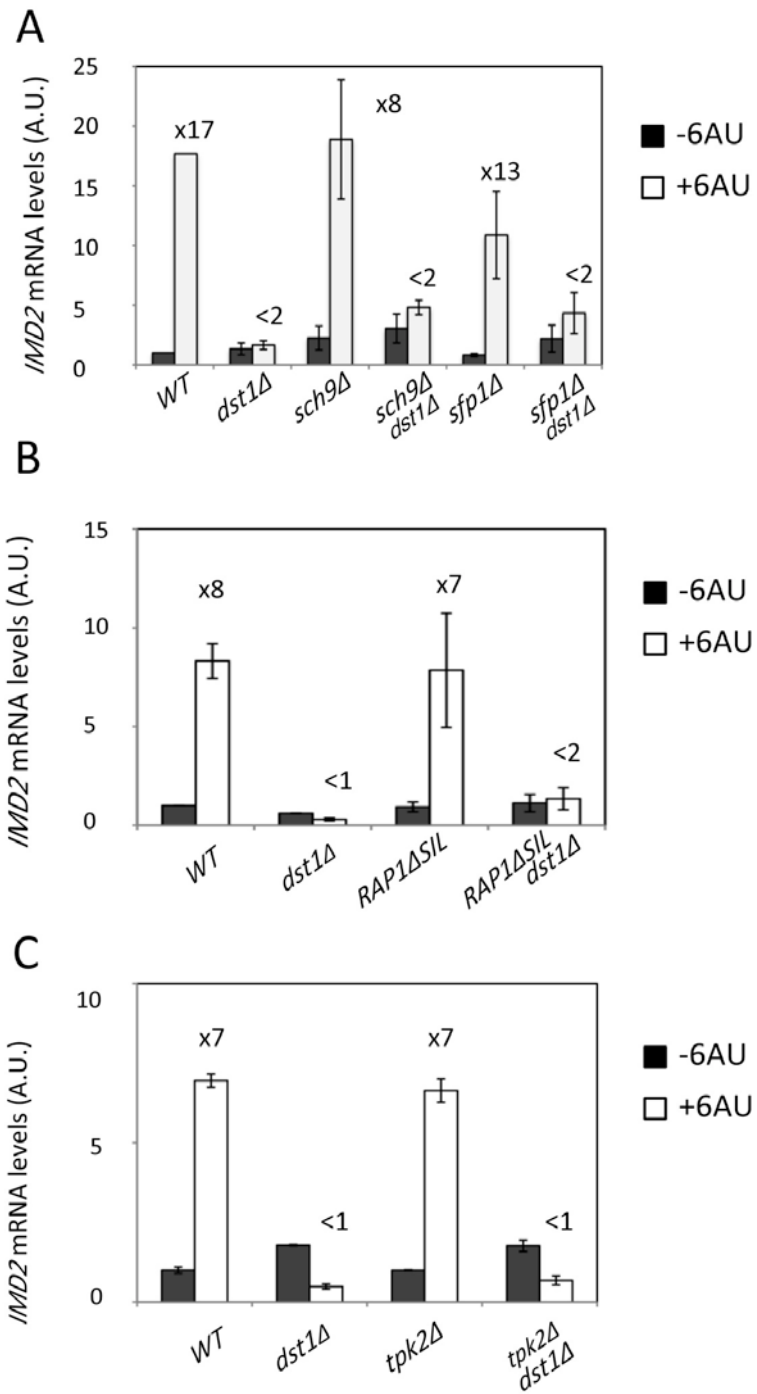

Figure S5

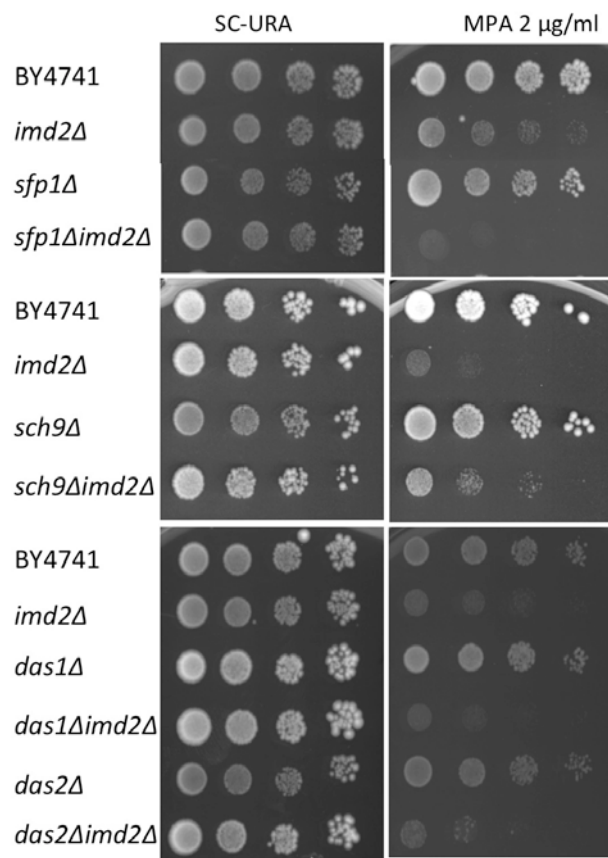



Figure S6

A

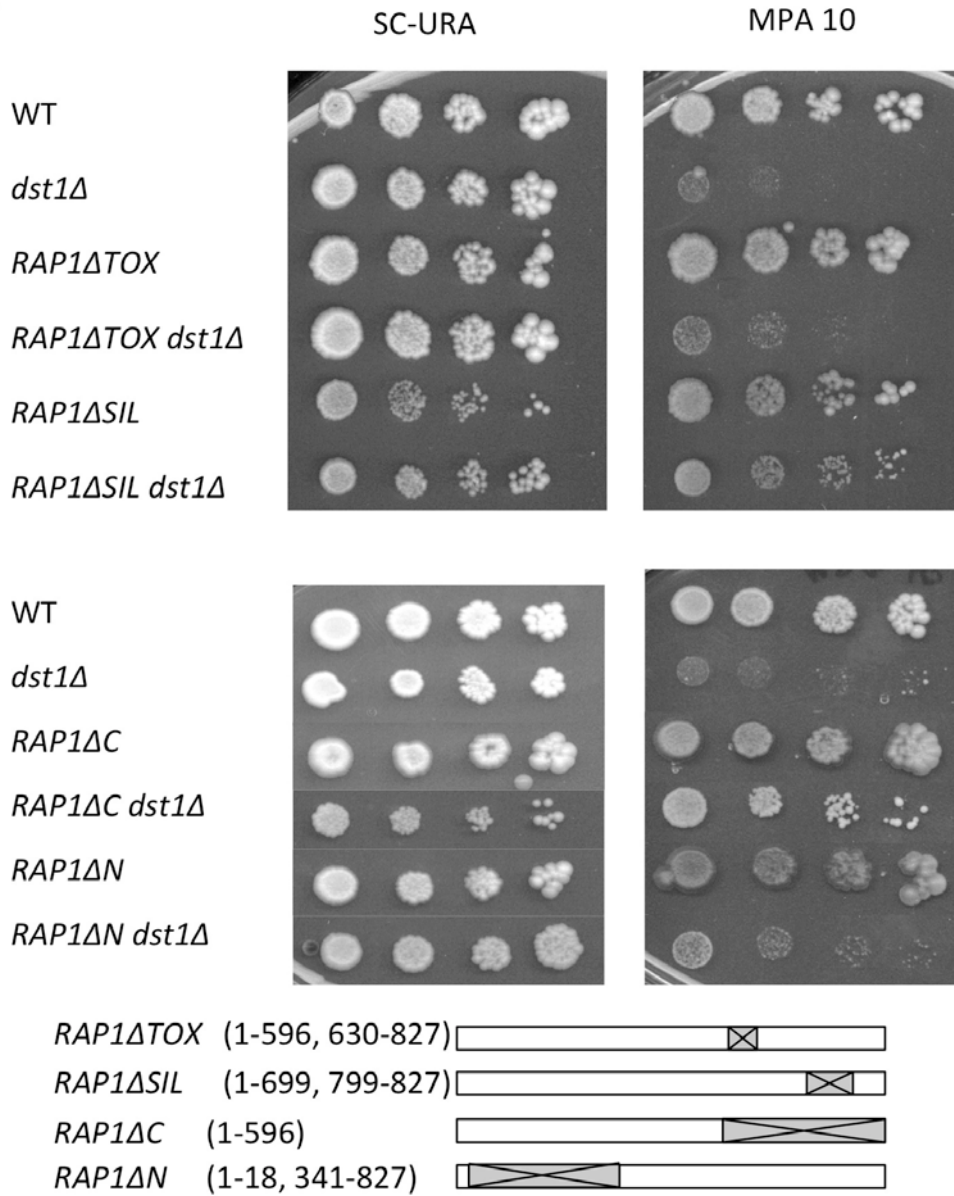

B

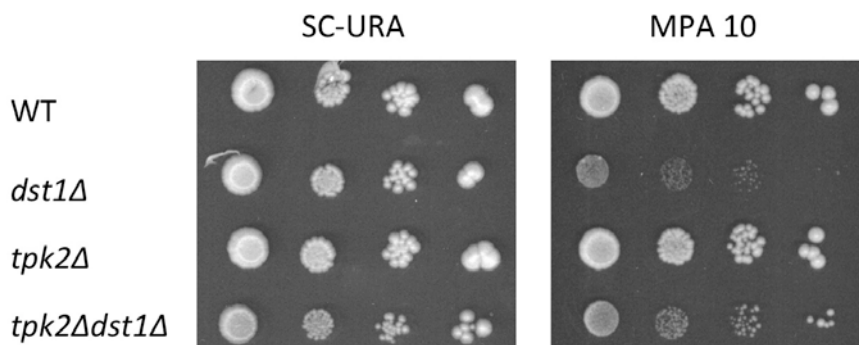

Figure S7

A

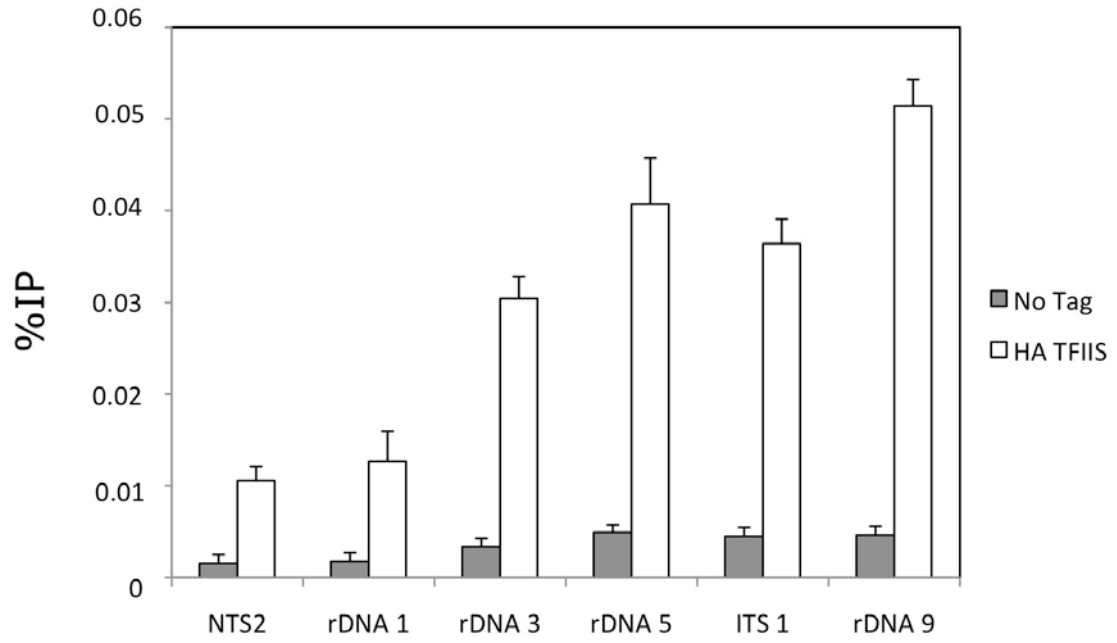

B

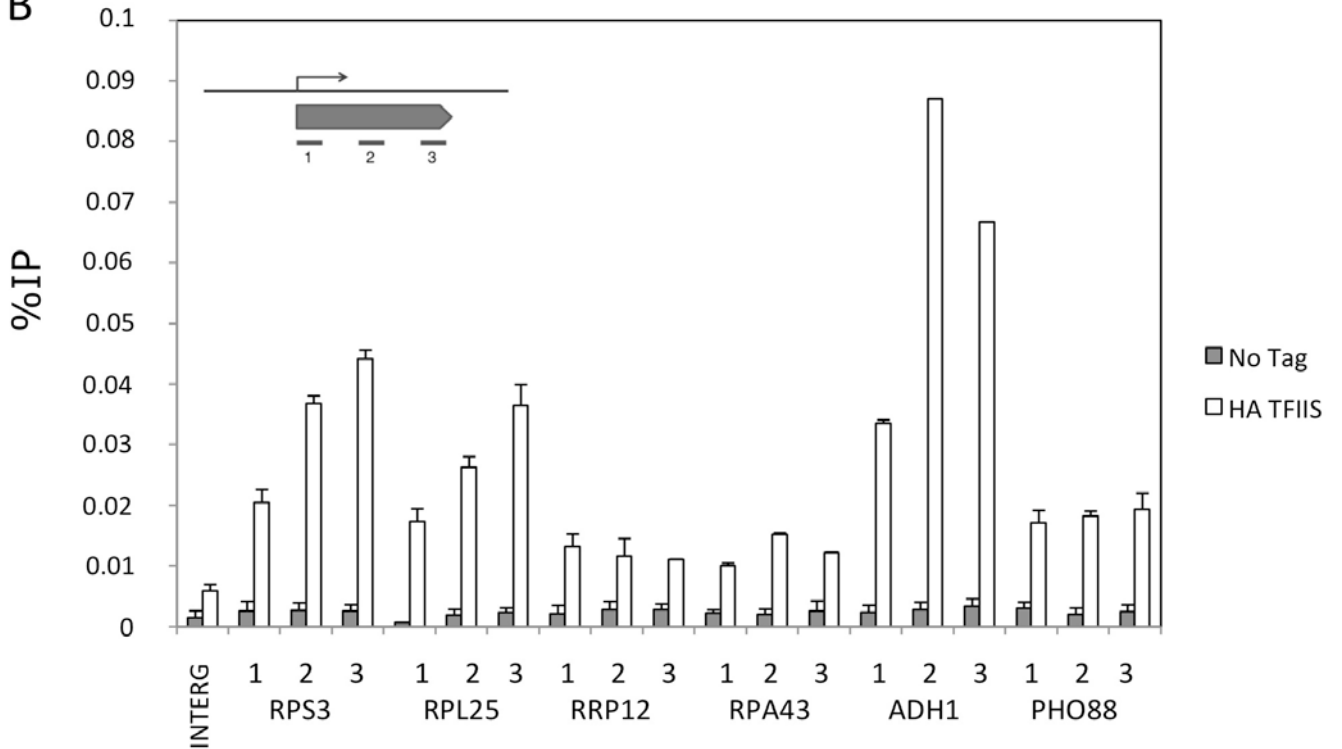

Figure S8

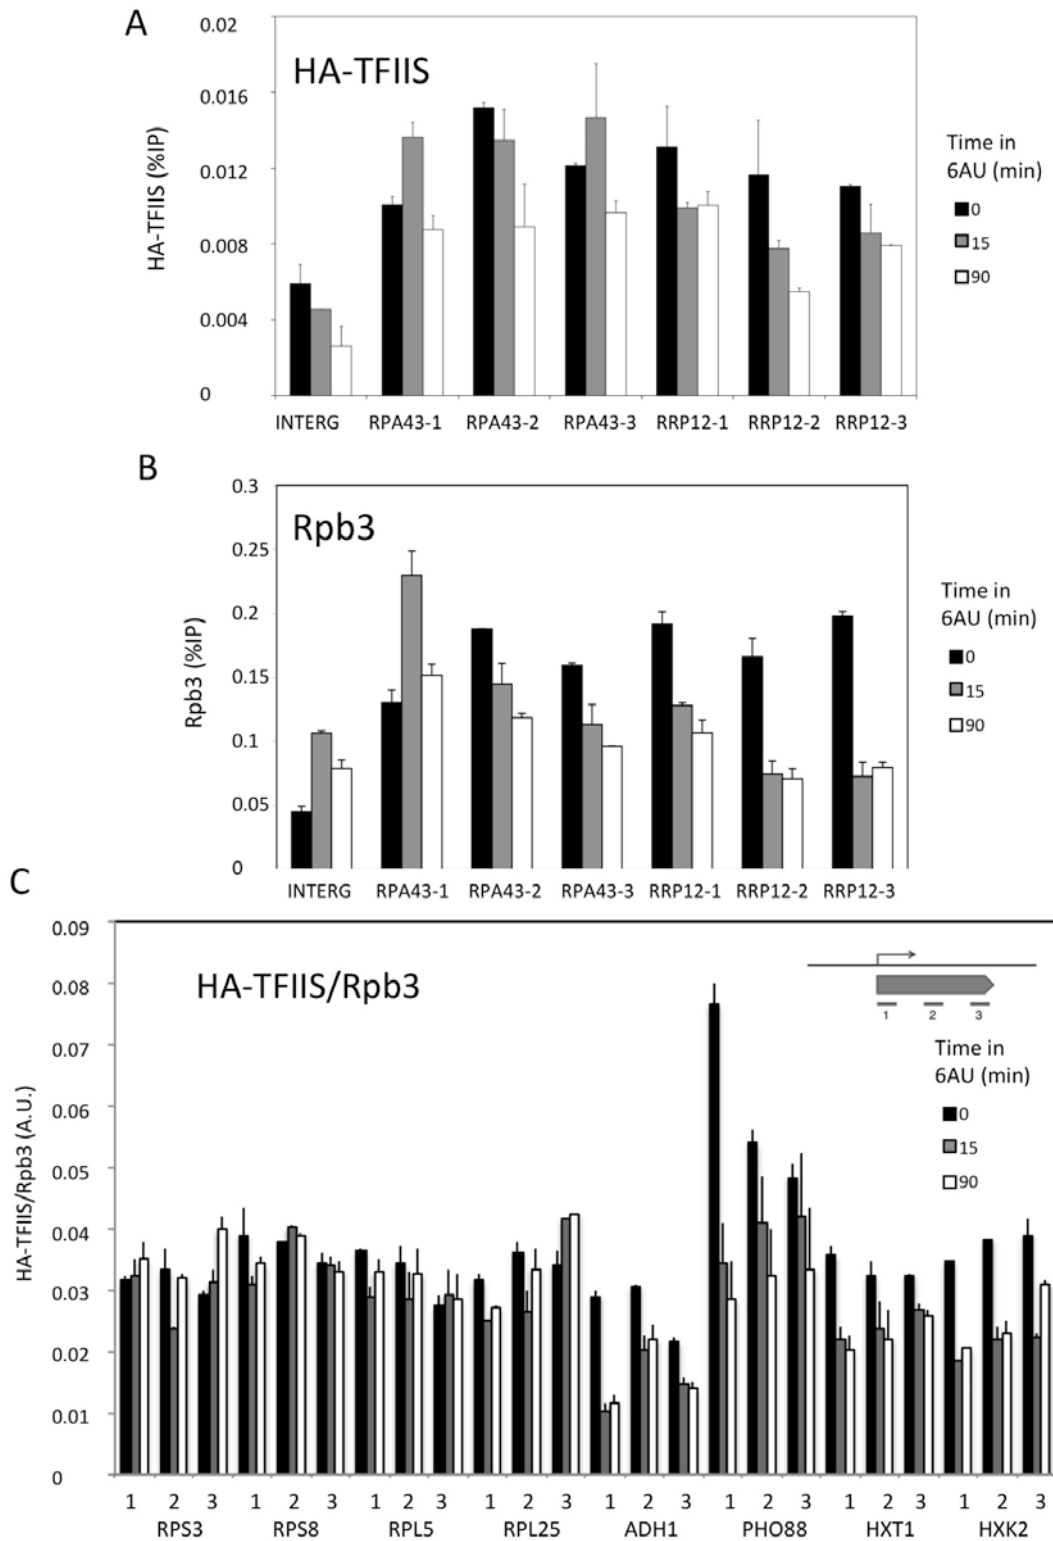

Figure S9

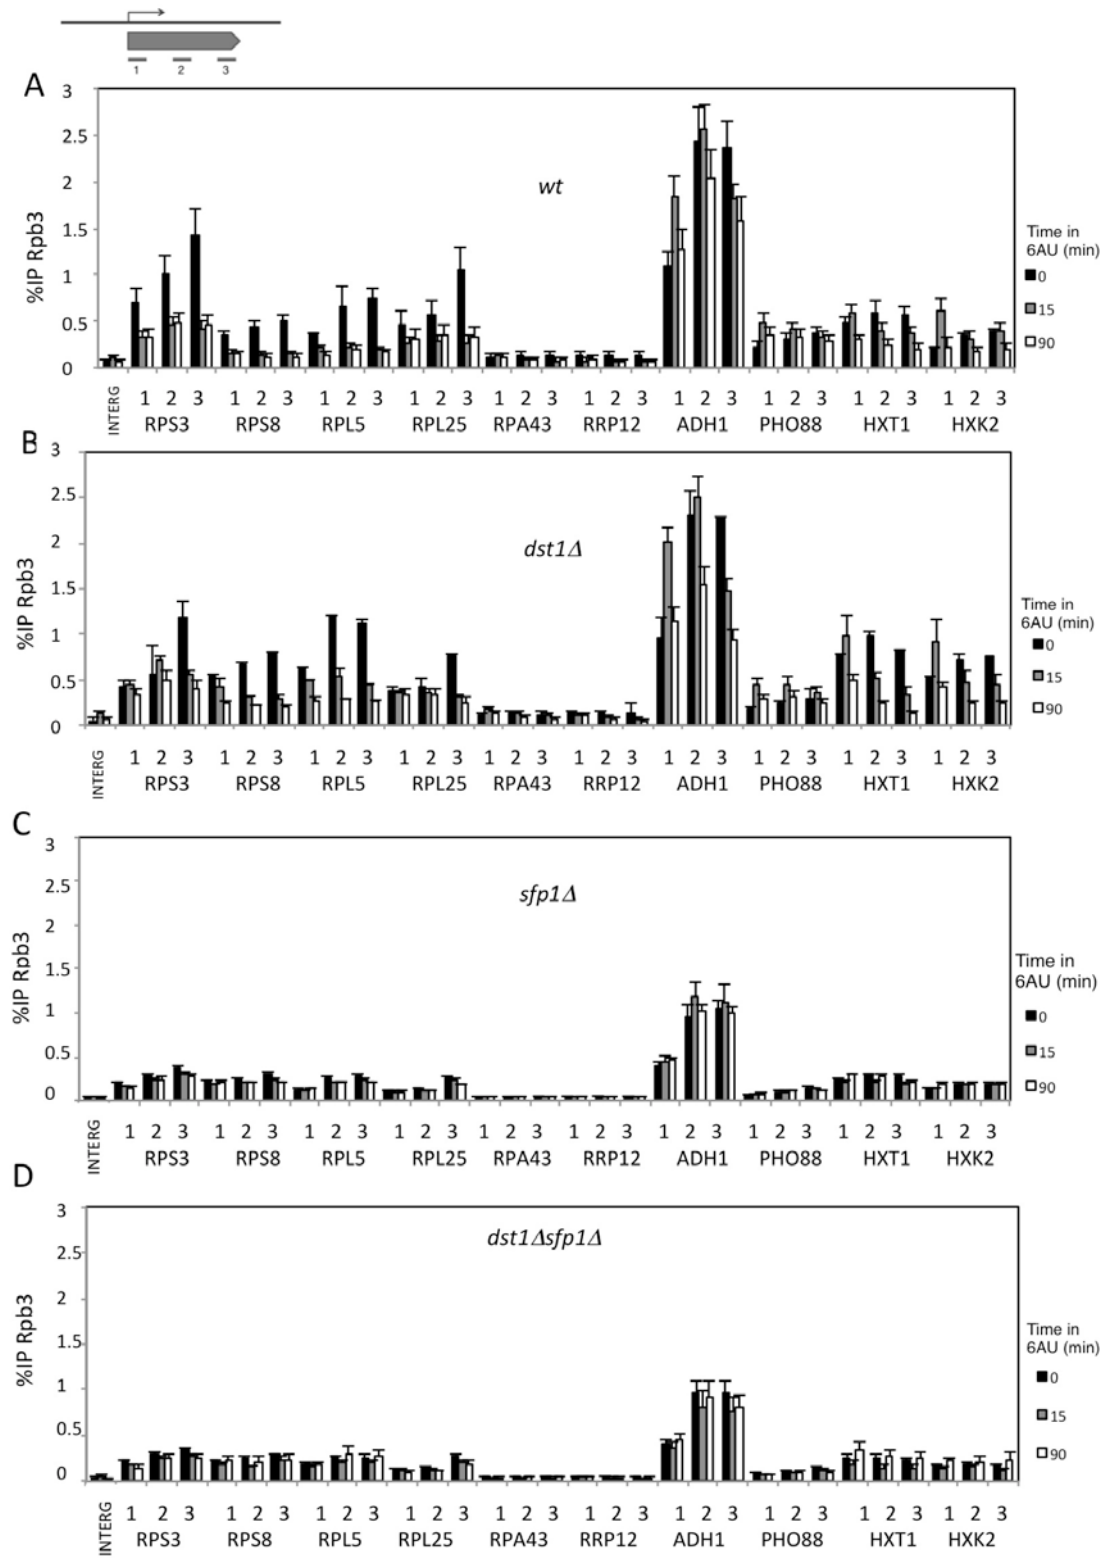

Fig S10

A

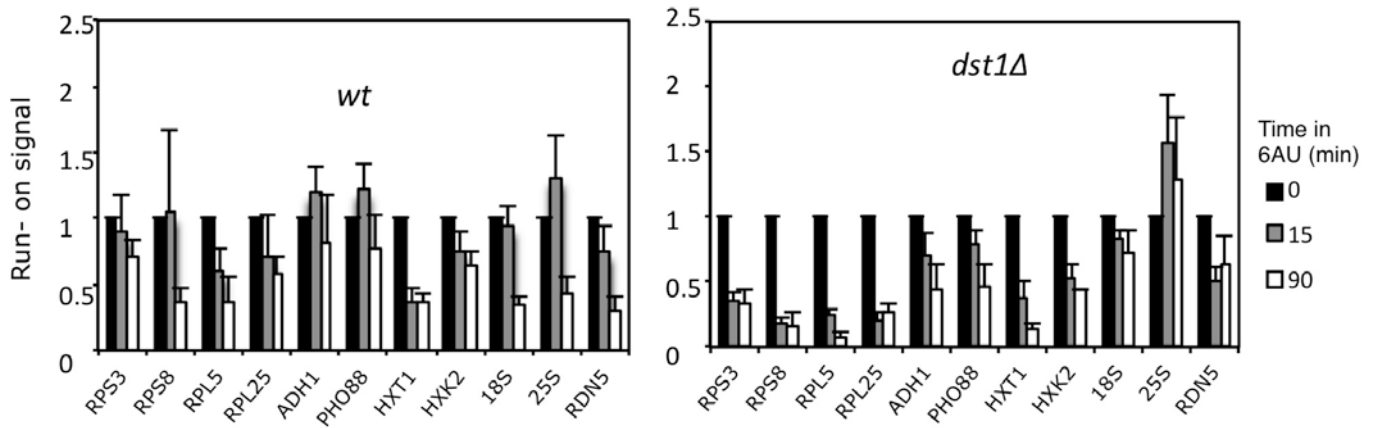

B

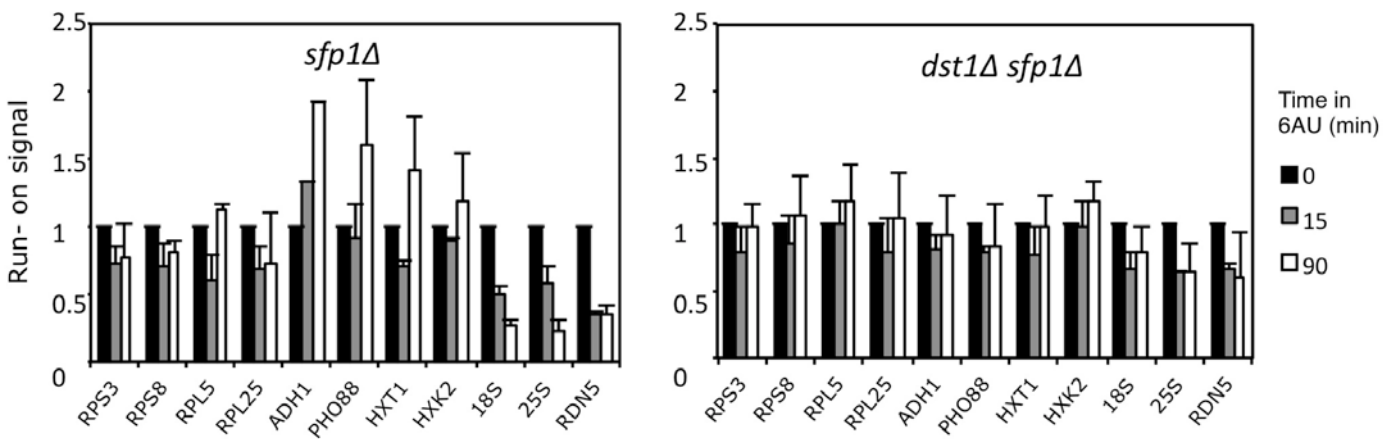

**Table S1. Yeast strains.**

| <b>Yeast strain</b> | <b>Relevant genotype</b>                                                                                          | <b>Reference</b>      |
|---------------------|-------------------------------------------------------------------------------------------------------------------|-----------------------|
| SchY66.9D           | MAT $\alpha$ <i>ade2-1 can1-100 ura3-1 leu2-3,112 his3-11,15 trp1-1 dst1<math>\Delta</math></i>                   | This work             |
| SchY66.4B           | MAT a <i>ade2-1 can1-100 ura3-1 leu2-3,112 his3-11,15 trp1-1 dst1<math>\Delta</math></i>                          | This work             |
| BY4741              | MAT a <i>his3<math>\Delta</math>1 leu2<math>\Delta</math>0 met15<math>\Delta</math>0 ura3<math>\Delta</math>0</i> | Euroscarf             |
| W303-1A             | MAT a <i>ade2-1 can1-100 ura3-1 leu2-3,112 his3-11,15 trp1-1</i>                                                  | Thomas et al, 1989    |
| MMY40               | SchY66.9D <i>rpl40A::mTnlacZLEU2</i>                                                                              | This work             |
| MMY9.2              | BY4741 <i>dst1::kanMX4</i>                                                                                        | This work             |
| MMY9.1              | BY4742 <i>dst1::kanMX4</i>                                                                                        | This work             |
| yMT2291             | BY4741 <i>sch9<math>\Delta</math>natR</i>                                                                         | Jorgensen et al, 2002 |
| FGY48.1B            | BY4742 <i>dst1::kanMX4 sch9<math>\Delta</math>natR</i>                                                            | This work             |
| Y05312              | BY4741 <i>sfp1::kanMX4</i>                                                                                        | Euroscarf             |
| Y15312              | BY4742 <i>sfp1::kanMX4</i>                                                                                        | Euroscarf             |
| FGY43.1B            | BY4741 <i>dst1::kanMX4 sfp1::kanMX4</i>                                                                           | This work             |
| Y01276              | BY4741 <i>das1::kanMX4</i>                                                                                        | Euroscarf             |
| Y03959              | BY4741 <i>das2::kanMX4</i>                                                                                        | Euroscarf             |
| MMY27.1             | BY4742 <i>dst1::kanMX4 das2::kanMX4</i>                                                                           | This work             |
| FGY41.41            | BY4741 <i>imd2::hphMX4</i>                                                                                        | This work             |
| FGY54.4C            | BY4741 <i>imd2::hphMX4 sch9<math>\Delta</math>natR</i>                                                            | This work             |
| FGY60.2A            | BY4741 <i>imd2::hphMX4 sfp1::kanMX4</i>                                                                           | This work             |
| SCR101              | MAT a <i>ade2-1 trp1-1 leu2 his3-11 ura3<math>\Delta</math>1 can1-100 GAL1::RAP1</i>                              | Graham et al, 1999    |
| FGY52.13c           | <i>GAL1::RAP1 dst1::kanMX4</i>                                                                                    | This work             |
| FGY52.14b           | <i>GAL1::RAP1 dst1::kanMX4</i>                                                                                    | This work             |
| Y01089              | BY4741 <i>tpk2::kanMX4</i>                                                                                        | Euroscarf             |
| LMY1.3B             | BY4741 <i>dst1::kanMX4 tpk2::kanMX4</i>                                                                           | This work             |
| Y07202              | BY4741 <i>trp1::kanMX4</i>                                                                                        | Euroscarf             |
| LMY5.2              | Y07202 <i>TRP1::pADH::3HA::DST1</i>                                                                               | This work             |
| ARG6                | BY4741 <i>RPA190-3XHA::HIS3MX6</i>                                                                                | This work             |
| ARG7                | BY4741 <i>RPA190-3XHA::HIS3MX6 dst1::kanMX4</i>                                                                   | This work             |

**Table S2.** Isolation of the *das* mutants.

| <b>Round</b> | <b>[6AU]<br/>μg/ml</b> | <b>Number of<br/>transformants</b> | <b>6AU<sup>r</sup></b> | <b>MPA<sup>r</sup></b> | <b>Unic<br/>insertion</b> | <b>Insertion<br/>ligated<br/>phenotype</b> |
|--------------|------------------------|------------------------------------|------------------------|------------------------|---------------------------|--------------------------------------------|
| 1            | 25                     | 7600                               | 2                      | 2                      | 2                         | 2                                          |
| 2            | 10                     | 7641                               | 7                      | 3                      | 2                         | 3                                          |
| 3            | 20                     | 4382                               | 5                      | 3                      | 3                         | 1                                          |

**Table S3.** Oligonucleotides

| <b>Primer</b>                  | <b>Sequence 5'-3'</b>        | <b>Use</b>              |
|--------------------------------|------------------------------|-------------------------|
| 3-D/A <sub>2</sub>             | GACTCTCCATCTCTTGTCTTCTTG     | Northern probe          |
| 5' A <sub>0</sub>              | GGTCTCTCTGCTGCCGG            | Northern probe          |
| 5.8S                           | TTTCGCTGCGTTCTTCATC          | Northern probe          |
| 5S                             | GGTCACCCACTACACTACTCGG       | Northern probe          |
| A <sub>2</sub> /A <sub>3</sub> | TGTTACCTCTGGGCCC             | Northern probe          |
| C <sub>1</sub> /C <sub>2</sub> | GAACATTGTTTCGCCTAGA          | Northern probe          |
| E/C <sub>2</sub>               | GGCCAGCAATTTCAAGTTA          | Northern probe          |
| PUR5 up                        | TGGCCGCCATTAGAGACTAC         | Northern probe          |
| PUR5 lo                        | ACGCCACCTTCTAGTTGAGC         | Northern probe          |
| ADH1 up                        | TCCAAAGCCAAAGGCCAACGA        | Northern/ Run-on probes |
| ADH1 lo                        | TTGGCACCAGCTGGCATAACCG       | Northern/ Run-on probes |
| RPS3 up                        | AAGAGATTCAAGTACGCTCCAGGT     | Northern/ Run-on probes |
| RPS3 lo                        | AAACCGTCAGCAAATTTTCATAGC     | Northern/ Run-on probes |
| RPS8 up                        | ATTCTCGTCACAAAAGATCC         | Northern/ Run-on probes |
| RPS8 lo                        | GTCTGGAAGAGATACAAGCG         | Northern/ Run-on probes |
| RPL5 up                        | ATGGCTTTCCAAAAAGACGC         | Run-on probes           |
| RPL5 lo                        | GATCTTGGCAGCAACACGAG         | Run-on probes           |
| RPL25 up                       | GCTACTGCCGCTAAGAAAGC         | Run-on probes           |
| RPL25 lo                       | TAGCAATGTCCAAAGCATCG         | Run-on probes           |
| PHO88 up                       | TGGTCATGATGCAACTCTCC         | Run-on probes           |
| PHO88 lo                       | TACCGGCTCTTTCAGCTTCT         | Run-on probes           |
| HXK2 up                        | TGCCAAAGGAATTGATGCAA         | Run-on probes           |
| HXK2 lo                        | TGAGGTTTGAGTCCAGCCGTA        | Run-on probes           |
| HXT1 up                        | GGCCATGAATACTCCAGAAGGT       | Run-on probes           |
| HXT1 lo                        | GCGCCTCTCTTGGATACTGG         | Run-on probes           |
| RDN5 up                        | GGTTGCGGCCATATCTACCA         | Run-on probes           |
| RDN5 lo                        | AGATTGCAGCACCTGAGTTT         | Run-on probes           |
| NTS2 up                        | AGTGAGGAACTGGGTTACCCG        | Q-PCR                   |
| NTS2 lo                        | TTTCTTTTGCCTCTCTGTCC         | Q-PCR                   |
| rDNA 1 up                      | AATTGAAGTTTTTCTCGGCGA        | Q-PCR                   |
| rDNA 1 lo                      | ATGAAGTACCTCCCAACTACTTTTCC   | Q-PCR                   |
| rDNA 2 up                      | AACAGTCTCATCGTGGGCA          | Q-PCR                   |
| rDNA 2 lo                      | TGAGAGGAGGTTACACTTGAAGAAT    | Q-PCR                   |
| rDNA 3 up                      | CAATAGCGTATATTAAGTTGTTGCAGTT | Q-PCR                   |
| rDNA 3 lo                      | AAAGTCCTGGTTCGCCAAGAG        | Q-PCR                   |
| rDNA 4 up                      | AACATTCTGTTTGGTAGTGAG        | Q-PCR                   |
| rDNA 4 lo                      | AGTATAAAAAAAGATTAGCCG        | Q-PCR                   |
| rDNA 5 up                      | TAACAGCTTATCACCCCGGAA        | Q-PCR                   |
| rDNA 5 lo                      | CGGTTATCAGTACGACCTGGC        | Q-PCR                   |
| REF up                         | TGTTCCTTTAAGAGGTGATGGTGAT    | Q-PCR                   |
| REF lo                         | GTGCGCAGTACTTGTGAAAACC       | Q-PCR                   |
| ADH1 5' up                     | GCACGGTGACTGGCCATT           | Q-PCR                   |
| ADH 5' lo                      | TCTTCCAGCCCTTAACGTTTTTC      | Q-PCR                   |
| ADH1 C up                      | TGCTAACTTGATGGCCGTC          | Q-PCR                   |
| ADH1 C lo                      | AGACTCTGTAACCCATAGCCTTGG     | Q-PCR                   |
| ADH1 3' up                     | ACGTCGGTAACAGAGCTGACAC       | Q-PCR                   |
| ADH1 3' lo                     | TTCTGGCAAGGTAGACAAGCC        | Q-PCR                   |
| PHO88 5' up                    | CATGTTGGTCATGATGCAACTCT      | Q-PCR                   |
| PHO88 5' lo                    | GTTGGGTCTCCATGTCAATG         | Q-PCR                   |
| PHO88 C up                     | GGTAATGCTATGTCCGGCGA         | Q-PCR                   |
| PHO88 C lo                     | TCTGACGGTAGTAACTTGCAGCTT     | Q-PCR                   |
| PHO88 3' up                    | CCTCTTCGGTAAGCCTGCAA         | Q-PCR                   |
| PHO88 3' lo                    | TGGAGCCTTGAATGGTCTCTTC       | Q-PCR                   |
| RPL25 5' up                    | CACGAGAAAATTGAGAGGAAGATAGA   | Q-PCR                   |



|             |                              |       |
|-------------|------------------------------|-------|
| RPL25 5' lo | CGTGTGGTTTTCGTATCTCATCA      | Q-PCR |
| RPL25 C up  | AGCAACGTAATTATCGGGCTCA       | Q-PCR |
| RPL25 C lo  | AACTTCCACAGCATCAACGCT        | Q-PCR |
| RPL25 3' up | TGGTTTTCCAAGTTTCCATGAA       | Q-PCR |
| RPL25 3' lo | AACTTCGTATAATTCCTTGACGGC     | Q-PCR |
| RPS3 5' up  | TTTTTGAACATTGTTTTGATAACTGAAA | Q-PCR |
| RPS3 5' lo  | AGAGATTAAGCGACCATTTTTGTAGT   | Q-PCR |
| RPS3 C up   | AAGAGATTCAAGTACGCTCCAGGT     | Q-PCR |
| RPS3 C lo   | GCGGACAAACCACGGTCT           | Q-PCR |
| RPS3 3' up  | GGTTGTGAAGTTGTTGTTTCCG       | Q-PCR |
| RPS3 3' lo  | AAACCGTCAGCAAATTTTCATAGC     | Q-PCR |
| HXK2 5' up  | TGCCAAAGGAATTGATGCAA         | Q-PCR |
| HXK2 5' lo  | CAATTCGGAAATGAAGTGCTTG       | Q-PCR |
| HXK2 C up   | GGCCATCAACTGTGAATACGG        | Q-PCR |
| HXK2 C lo   | GGCCTGGTCTTGGAGATTCTTC       | Q-PCR |
| HXK2 3' up  | GTCCGTTTGTGGTATTGCTGC        | Q-PCR |
| HXK2 3' lo  | TGAGGTTTGTAGTCCAGCCGTA       | Q-PCR |
| HXT1 5' up  | GGCCATGAATACTCCAGAAGGT       | Q-PCR |
| HXT1 5' lo  | GAAACCACCGAAAGCAACCA         | Q-PCR |
| HXT1 C up   | CGTTATTTGGTTGAAGCTGGC        | Q-PCR |
| HXT1 C lo   | AAGATGCAGTACCAGCGGCT         | Q-PCR |
| HXT1 3' up  | TCATGGGCTGTATGGTTTTCG        | Q-PCR |
| HXT1 3' lo  | GCGCCTCTCTTGGATACTGG         | Q-PCR |
| RPS8 5' up  | CGTCACAAAAGATCCGCTACC        | Q-PCR |
| RPS8 5' lo  | TCTTGGTGTGGCTGGTTGA          | Q-PCR |
| RPS8 C up   | CCAAGAAGACCAGAATTGCTGG       | Q-PCR |
| RPS8 C lo   | AGCATCAATTTGGACAATGGC        | Q-PCR |
| RPS8 3' up  | GCTGCTTCTGCCAAGATCG          | Q-PCR |
| RPS8 3' lo  | CGGATTGACCTGGTCTGGAA         | Q-PCR |
| RPL5 5' up  | CCAAAAAGACGCTAAGTCCTCTG      | Q-PCR |
| RPL5 5' lo  | CTTGGCCTTGTGTTGGGTG          | Q-PCR |
| RPL5 C up   | TGGGTTTGGACGAAACTTACAA       | Q-PCR |
| RPL5 C lo   | AGAGCACCGAAAACCTCTGGC        | Q-PCR |
| RPL5 3' up  | CACTTCTGCTCACGAAGCTATCA      | Q-PCR |
| RPL5 3' lo  | GATCTTGGCAGCAACACGAG         | Q-PCR |
|             |                              |       |
|             |                              |       |
